# Supplementary material
Source: Springer Nature journal article supplement (https://www.springermedizin.de/resource/supplementary/12913_2011_1883_MOESM1_ESM.pdf/9529162)
Supplement: MOESM1 [file 9529162]

3.276

Excluded: 254

- Principal pathologies at admission which complicate the exacerbation (176) of admitted patients
- Principal pathologies at admission which complicate the exacerbation (22) of discharged patients
- At the 2<sup>nd</sup> month revision the final diagnostic it's not COPD (56)

History record not available: 145

2.877

ADMITTED

DISCHARGED

1.747

1.130

Revision after 2 months

2 months history record not available: 23

Died between admission and 2 months: 59

2 months history record not available: 32

Died between discharge and 2 months : 5

Revision after 2 months

1.665

1.093

60- day interview

1.543

60- day interview

980
